# Supplementary material for: Synthesis, Spectral Characterization, and Biological Activities of Some Metal Complexes Bearing an Unsymmetrical Salen-Type Ligand, (Z)-1-(((2-((E)-(2-Hydroxy-6-methoxybenzylidene)amino)phenyl)amino) methylene) Naphthalen-2(1H)-one
Source: Hindawi journal article supplement (doi:10.1155/2023/4563958), 2023-02-04
Supplement: f1 [file 4563958.f1.docx]

**Supplementary Information**

**Synthesis, Spectral Characterization and Biological activities of Some Metal Complexes Bearing an Unsymmetrical Salen-type Ligand, (Z)-1-(((2-((E)-(2-hydroxy-6-methoxybenzylidene)amino)phenyl)amino) methylene)naphthalen-2(1H)-one**

**Quang Trung Nguyen *, Phuong Nam Pham Thi, Quang Do Bui, Van Tuyen Nguyen**

*Institute of Chemistry, Vietnam Academy of Science and Technology,*

*18 Hoang Quoc Viet, Cau Giay, Ha Noi, Vietnam*

*Corresponding author e-mail: [trungquang_cnhh@yahoo.com](mailto:trungquang_cnhh@yahoo.com)

**Table of Contents page**

S1. Mass spectra of synthetic compounds ………………………………………..…….……..….…….2

S2. NMR spectra of **H2L**……...................................................................................................................5

S3. NMR spectra of **[Zn(L).H2O]**…….....................................................................................................7

S4. FT-IR spectra of synthetic compounds................................................................................................9

S5. UV-Vis spectra of synthetic compounds ….......................................................................................12

S6. TGA diagrams of synthetic compounds………………………………………………..…...…........15

S7. Antibacterial assay…………………………………………………………………………...……...18

**S1. Mass spectra of synthetic compounds**


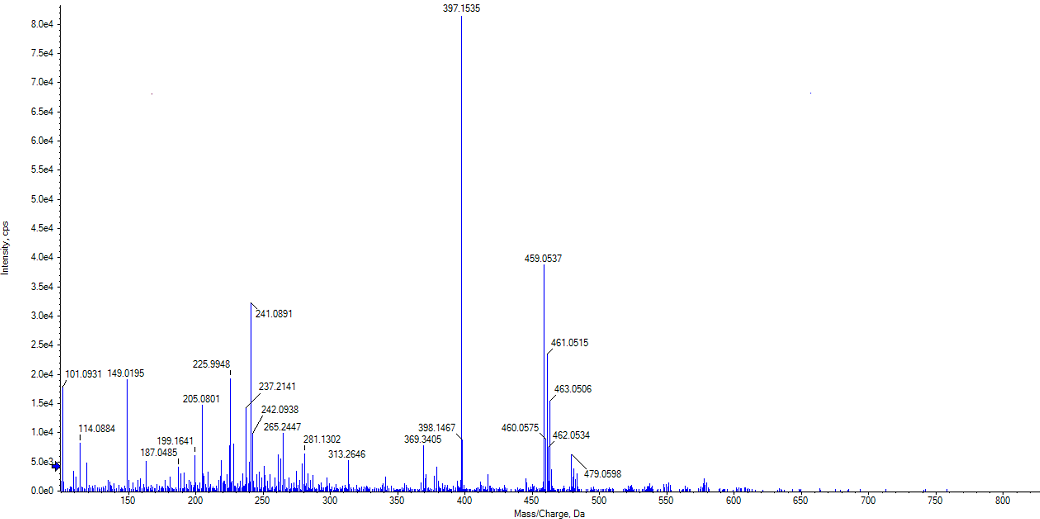


**Figure S1a.** +IDA-TOF-MS of **H2L**


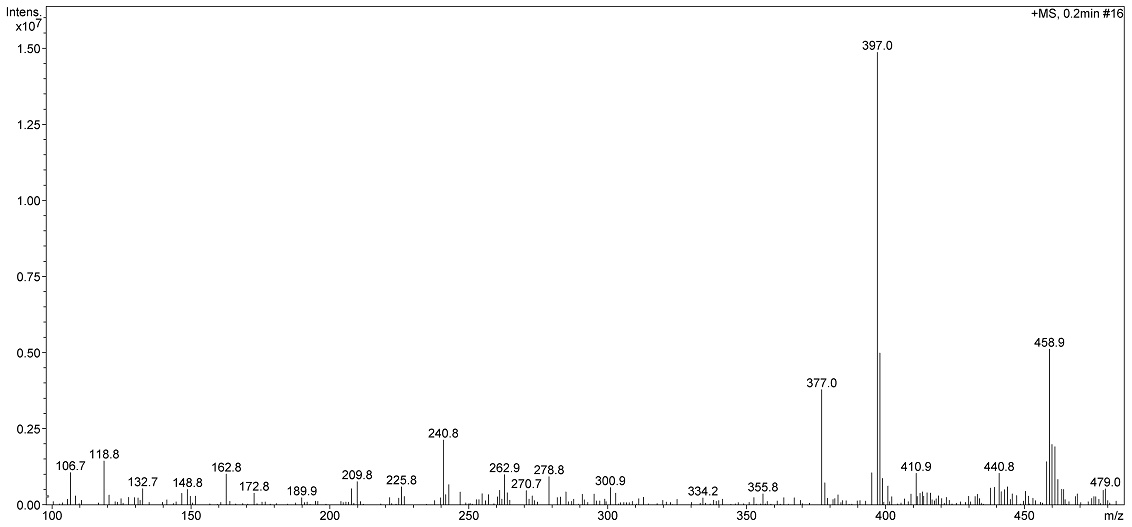


**Figure S1b.** ESI-MS of **[Zn(L).H2O]**


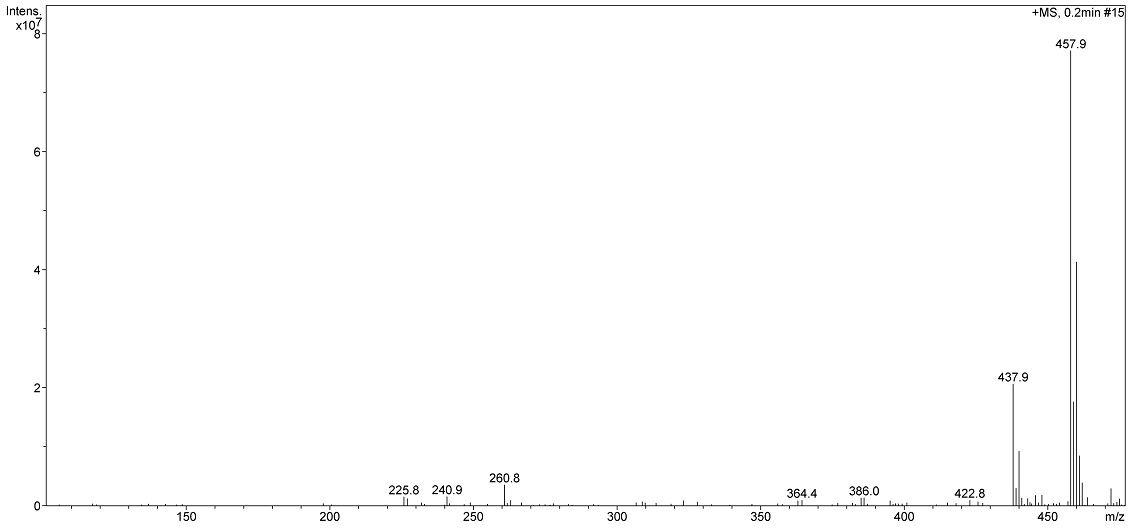


**Figure S1c.** ESI-MS of **[Cu(L)]**


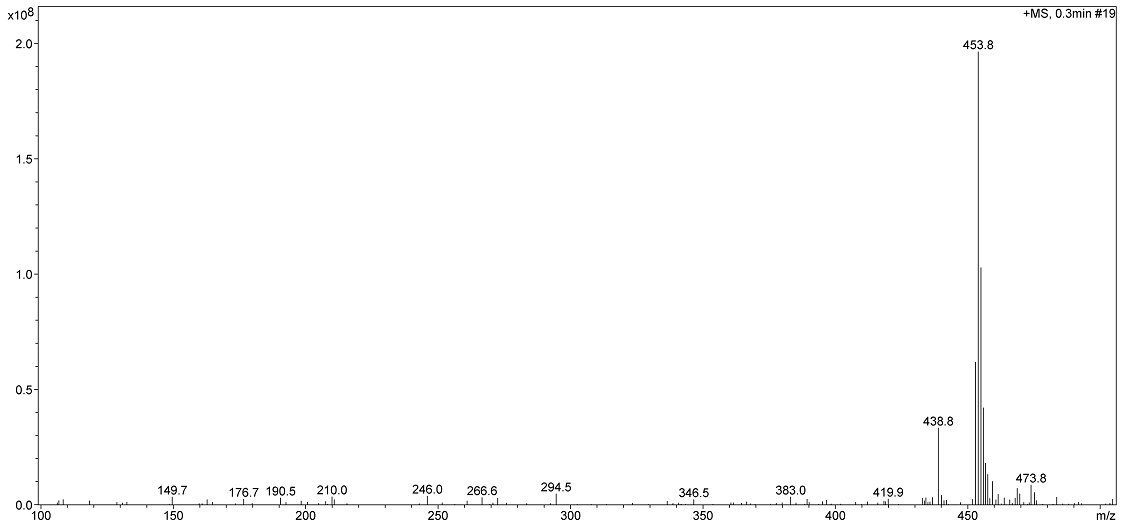


**Figure S1d.** ESI-MS of **[Co(L)]**


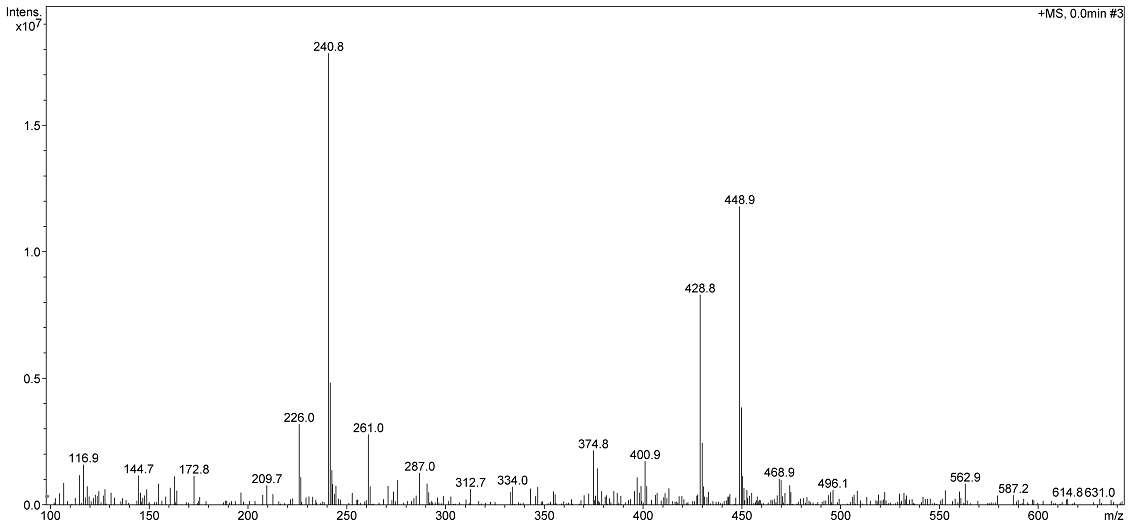


**Figure S1e.** ESI-MS of **[Mn(L)]**


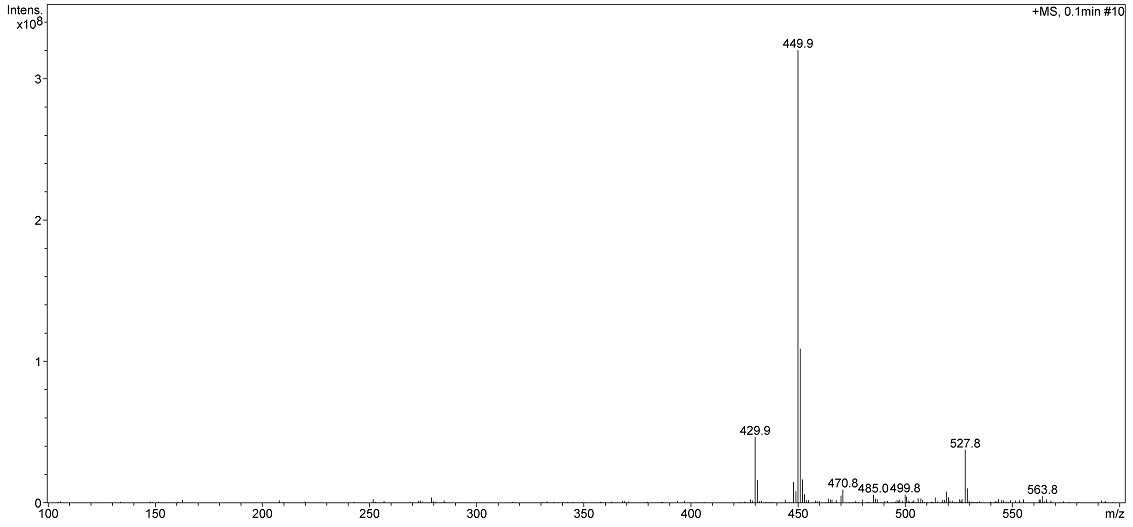


**Figure S1f.** ESI-MS of **[Fe(L)Cl]**

**S2. NMR spectra of H2L**

**
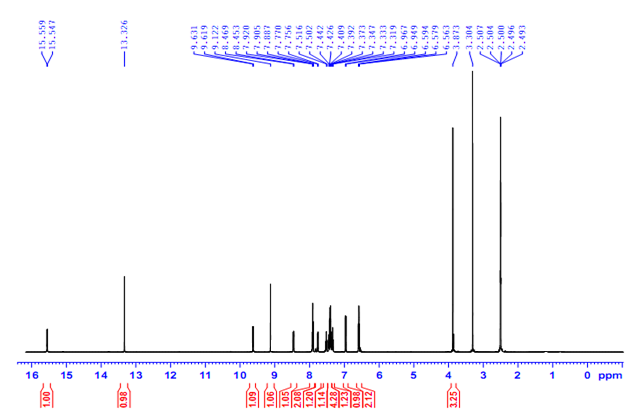
**

**Figure S2a.** 1H-NMR spectra of **H2L**

**
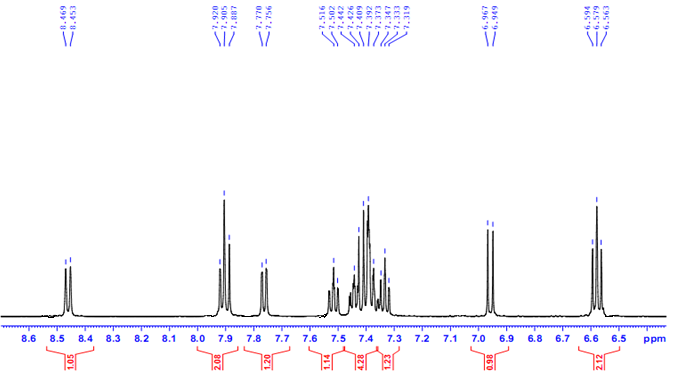
**

**Figure S2b.** Enlarged 1H-NMR spectra of **H2L**


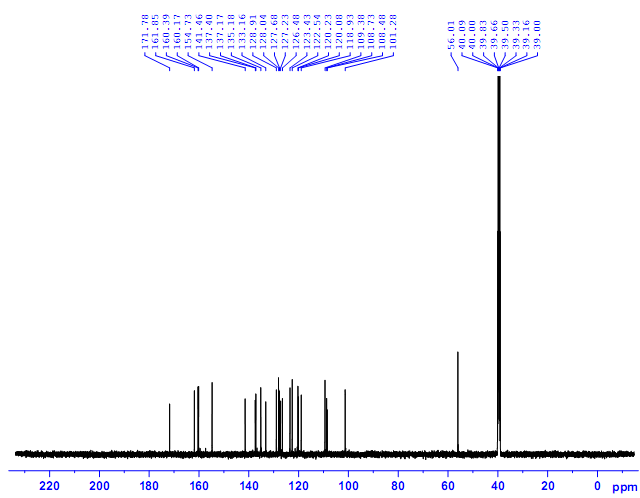


**Figure S2c.** 13C-NMR spectra of **H2L**


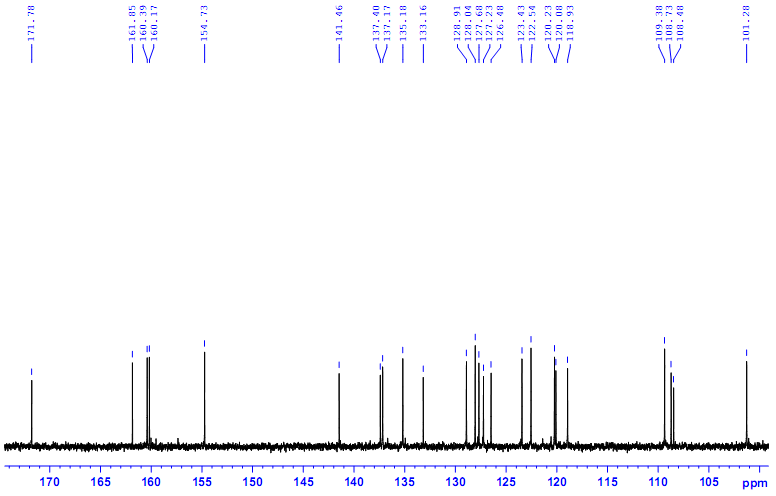


**Figure S2d.** Enlarged 13C-NMR spectra of **H2L**

**S3. NMR spectra of** **[Zn(L).H2O]**

**
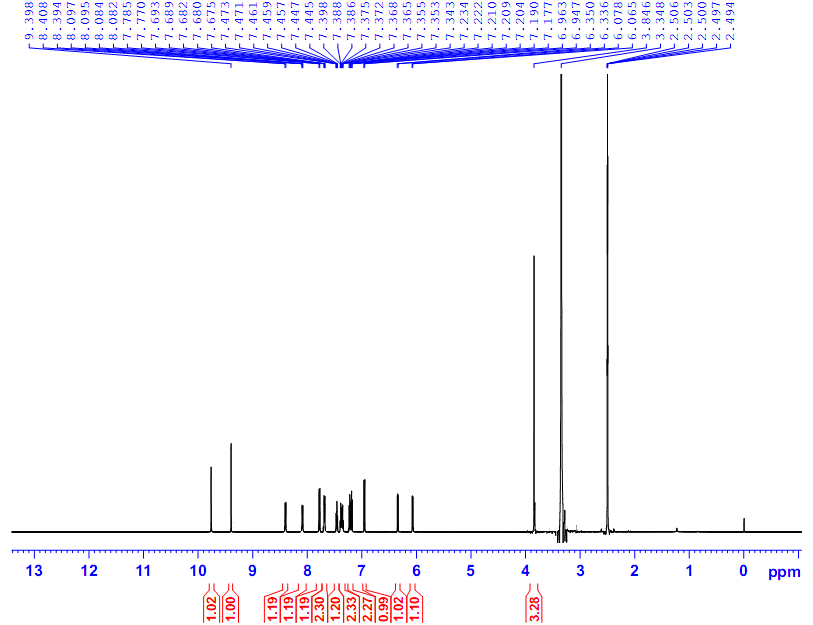
**

**Figure S3a.**1H-NMR spectra of **[Zn(L).H2O]**

**
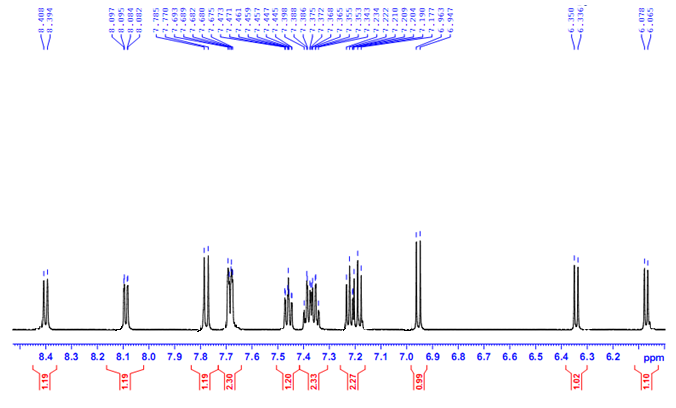
**

**Figure S3b.**Enlarged 1H-NMR spectra of **[Zn(L).H2O]**


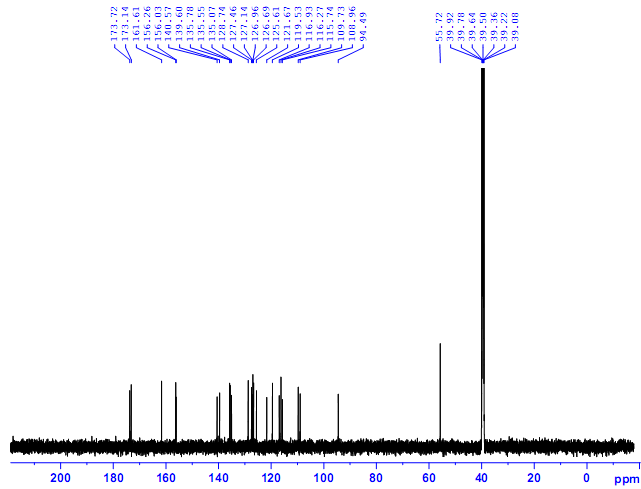


**Figure S3c.**13C-NMR spectra of **[Zn(L).H2O]**


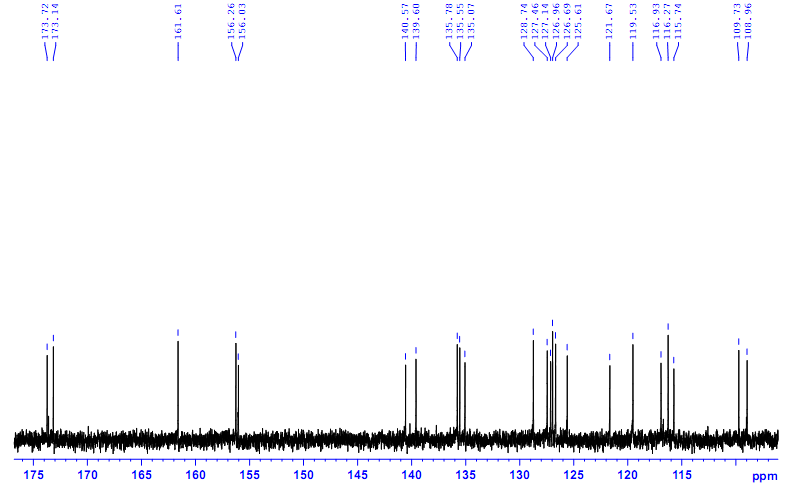


**Figure S3d.**Enlarged 13C-NMR spectra of **[Zn(L).H2O]**

**S4. FT-IR spectra of synthetic compounds**


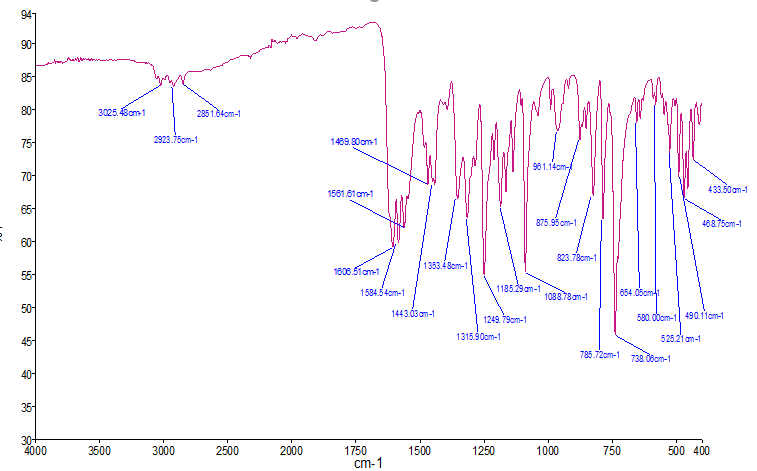


**Figure S4a**. FT-IR spectrum of **H2L**


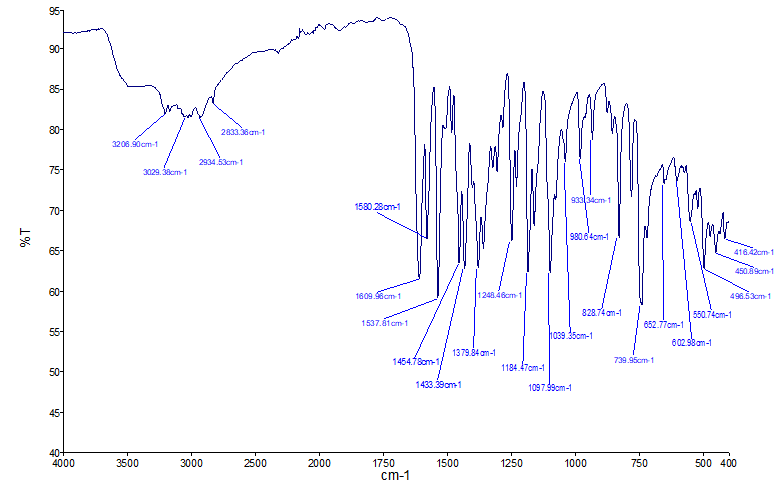


**Figure S4b.** FT-IR spectrum of **[Zn(L).H2O]**


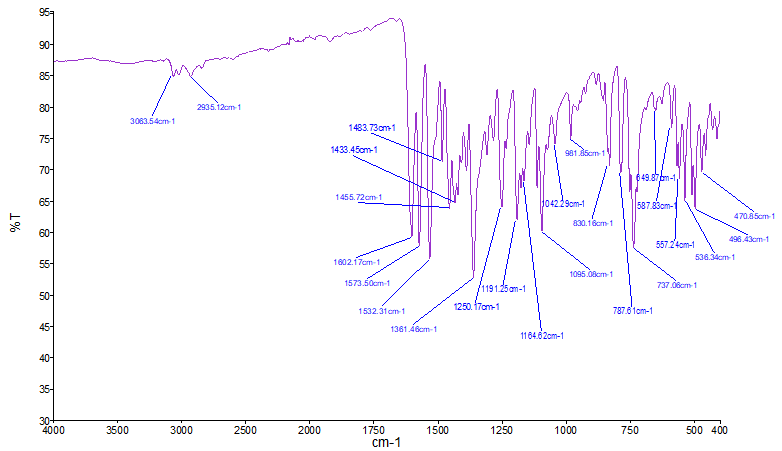


**Figure S4c.** FT-IR spectrum of **[Cu(L)]**


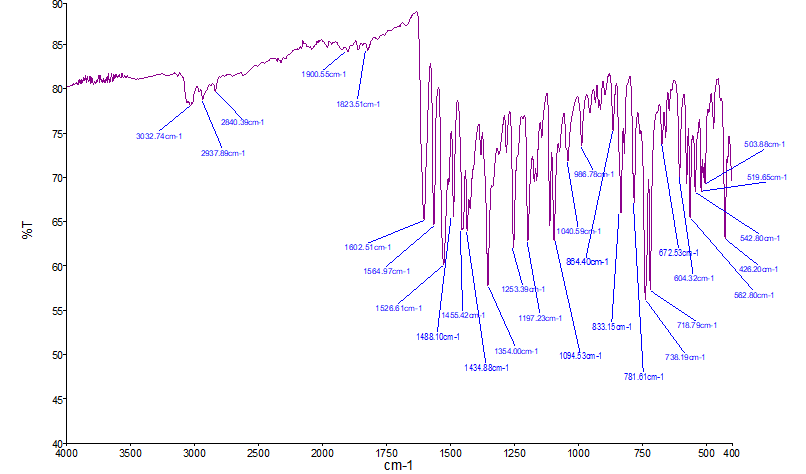


**Figure S4d.** FT-IR spectrum of **[Co(L)]**


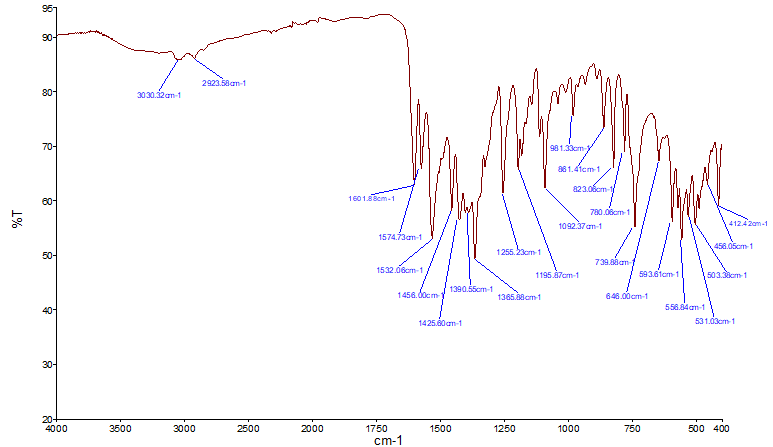


**Figure S4e.** FT-IR spectrum of **[Mn(L)]**


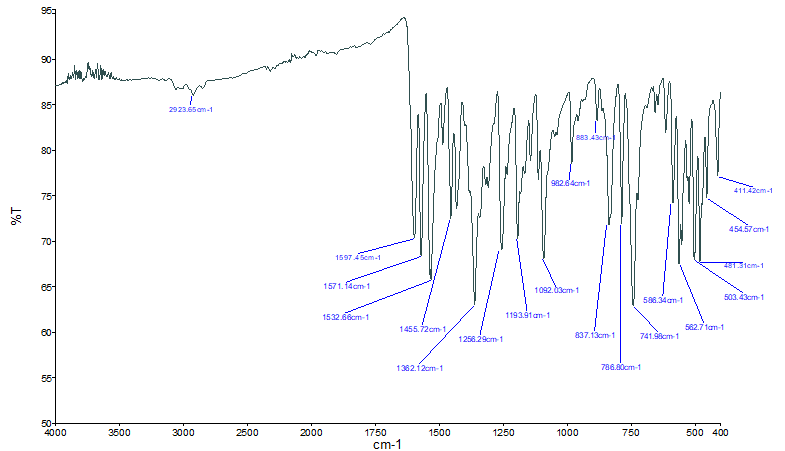


**Figure S4f.** FT-IR spectrum of **[Fe(L)Cl]**

**S5. UV-Vis spectra of synthetic compounds**


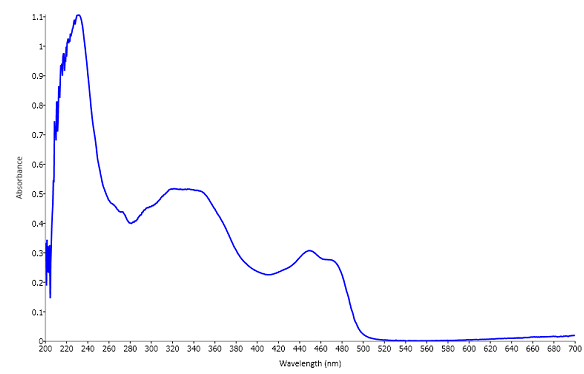


**Figure S5a.** UV-Vis spectrum of **H2L**


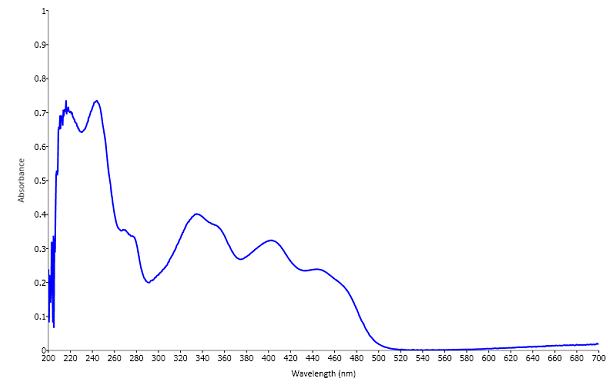


**Figure S5b.** UV-Vis spectrum of **[Zn(L).H2O]**


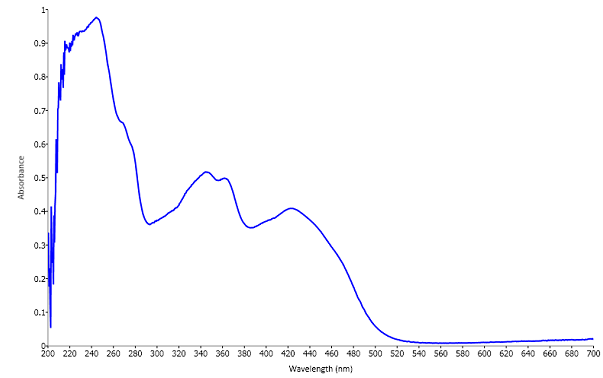


**Figure S5c.** UV-Vis spectrum of **[Cu(L)]**


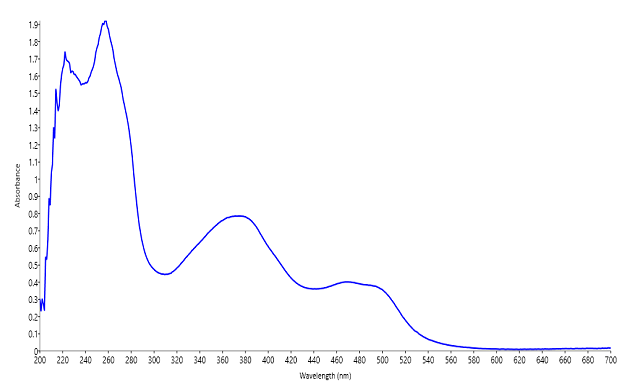


**Figure S5d.** UV-Vis spectrum of **[Co(L)]**


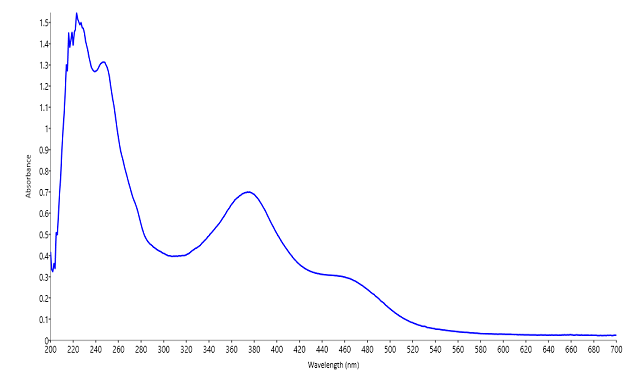


**Figure S5e.** UV-Vis spectrum of **[Mn(L)]**


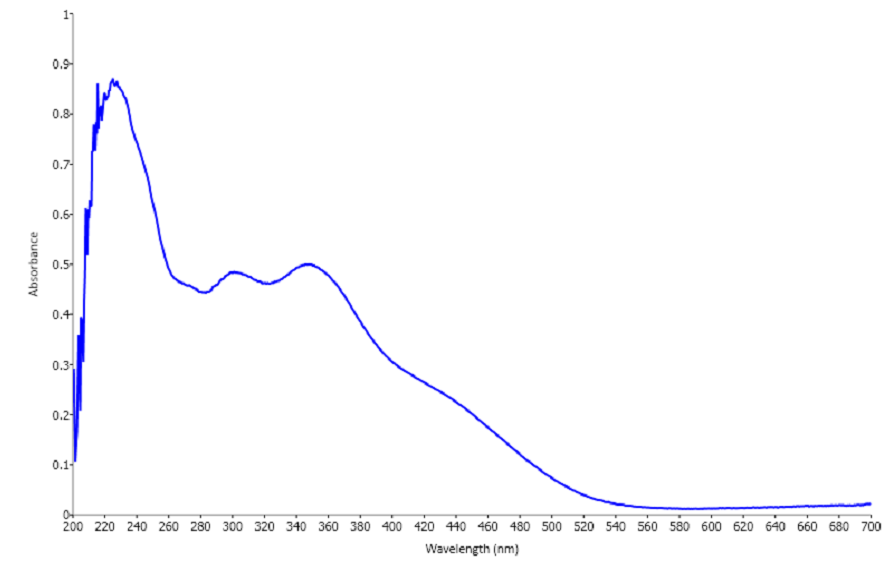


**Figure S5f.** UV-Vis spectrum of **[Fe(L)Cl]**

**S6. TGA diagrams of synthetic compounds**

**Figure S6a.** TGA diagram of **H2L**

**Figure S6b.** TGA diagram of **[Zn(L).H2O]**

**Figure S6c.** TGA diagram of **[Cu(L)]**

**Figure S6d.** TGA diagram of **[Co(L)]**

**Figure S6e.** TGA diagram of **[Mn(L)]**

**Figure S6f.** TGA diagram of **[Fe(L)Cl]**

**S7. Antibacterial assay**

| **Compound** | **Bacteria** | |
| --- | --- | --- |
| ***S. aureus*** | ***E.coli*** |
| **H2L** | 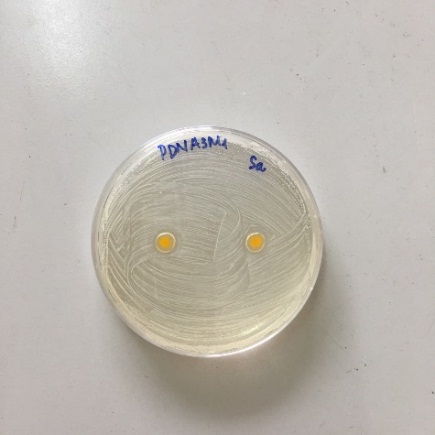 | 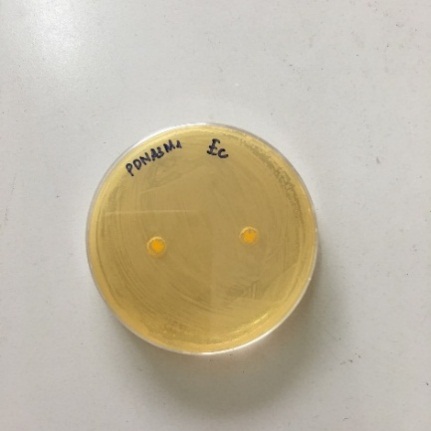 |
| **[Zn(L).H2O]** | 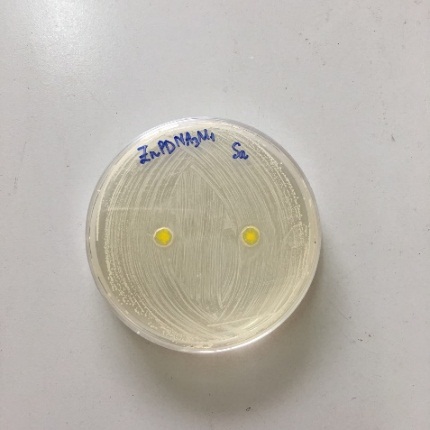 | 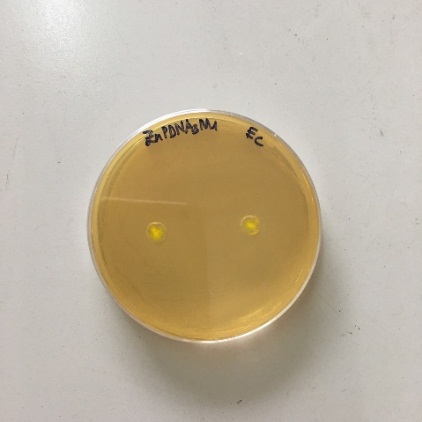 |
| **[Cu(L)]** | 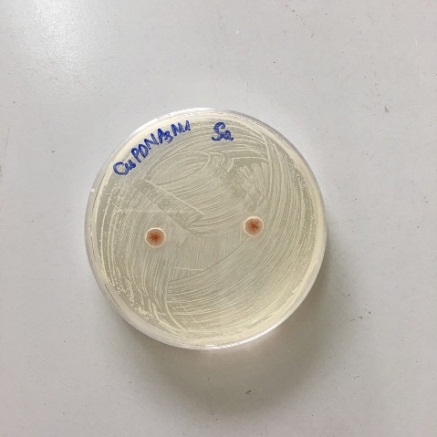 | 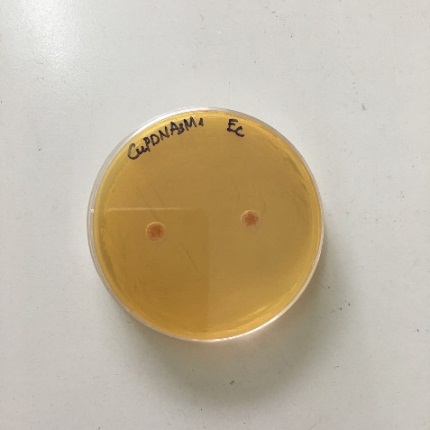 |
| **[Co(L)]** | 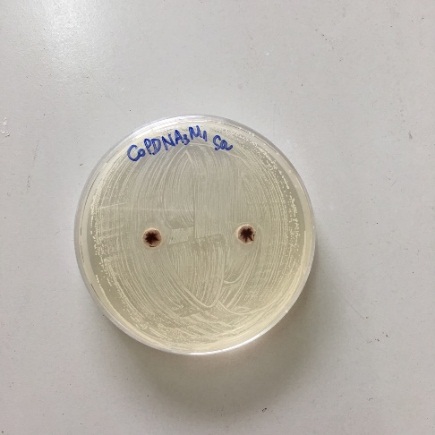 | 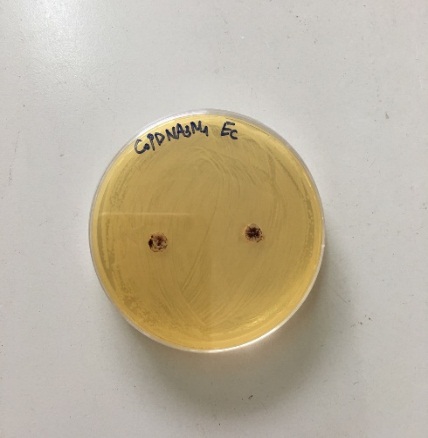 |
| **[Mn(L)]** | 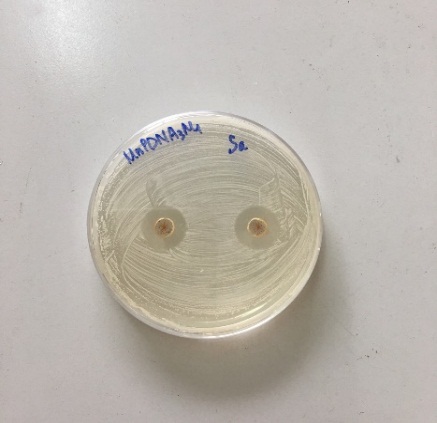 | 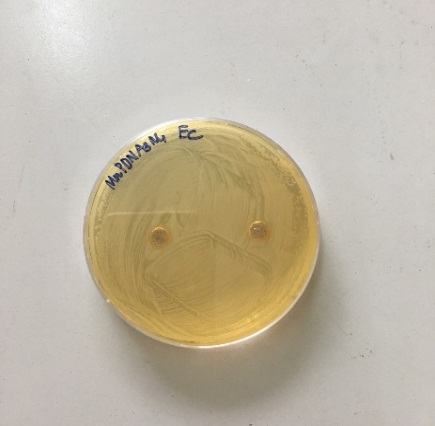 |
| **[Fe(L)Cl]** | 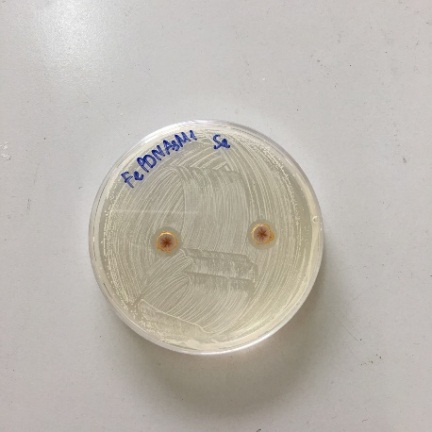 | 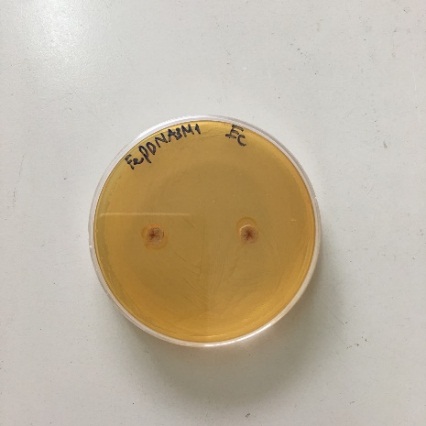 |
